# Supplementary material for: Transcriptome Analysis and Screening of Genes Associated with Flower Size in Tomato (Solanum lycopersicum)
Source: MDPI journal article supplement (doi:10.3390/ijms232415624), 2022-12-09
Supplement: s1 [file s1]

**Table S1** Primers used for qRT-PCR

| Gene ID               | primer-F (5'-3')      | primer-R (5'-3')       |
|-----------------------|-----------------------|------------------------|
| <i>Solyc04g081000</i> | GACAGAGGATGGGAGAAAGCC | CAGTTGGAAATCCAAGCACGG  |
| <i>Solyc04g015530</i> | CCACCATTGCCACAGGTGAT  | ATCCTCCCGGCCAAGTCTTA   |
| <i>Solyc05g056620</i> | TCATGGCATTGTGGTGAGCA  | TCAGGCCCTACTTGTGAGGT   |
| <i>Solyc02g087860</i> | AGCAGAAGGTCGAGGCAATC  | GATGCCGATGCCTTGCTAGA   |
| <i>Solyc08g067230</i> | GAACTCAGGCACCTAAAGGG  | TGTCTGCTCAAACACTTCCCC  |
| <i>Solyc02g071730</i> | CTGCGCGCACAAATTGAAAA  | ATGCTGATGCTGAGCTCTCT   |
| <i>Solyc07g062710</i> | TTCTACGCCGTCGGATCAAG  | TTCTCCGGGCTCATTCTTCG   |
| <i>Solyc02g083950</i> | TGCAGGCAAAGTAGTAGCCG  | AGCAGCAATGAGCCTCTTCTT  |
| <i>SIEF-1α</i>        | CCACCAATCTTGTACACATCC | AGACCACCAAGTACTACTGCAC |

**Table S2** qRT-PCR reaction system

| Reactant of the system       | The required volume |
|------------------------------|---------------------|
| cDNA                         | 2 μL                |
| primer-F (10 μM)             | 0.5 μL              |
| primer-R (10 μM)             | 0.5 μL              |
| 2×ChamQ SYBR qPCR Master Mix | 10 μL               |
| RNase-Free Water             | 7 μL                |
| Total volume                 | 20 μL               |

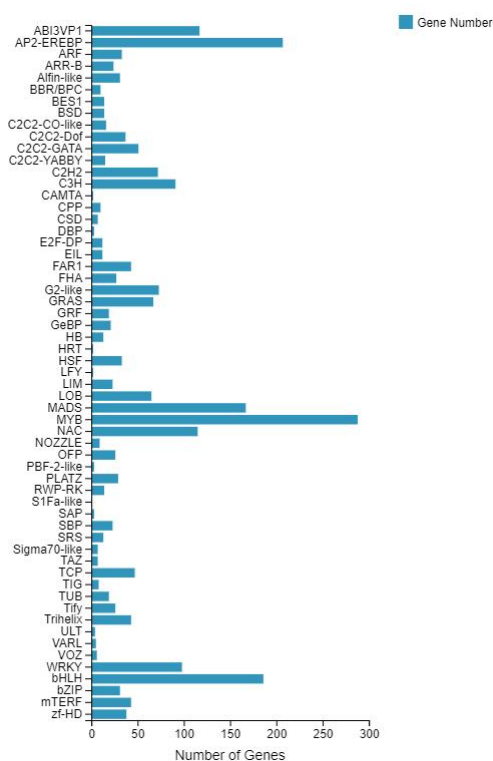**Figure S1.**Classification of transcription factor families to which genes belong

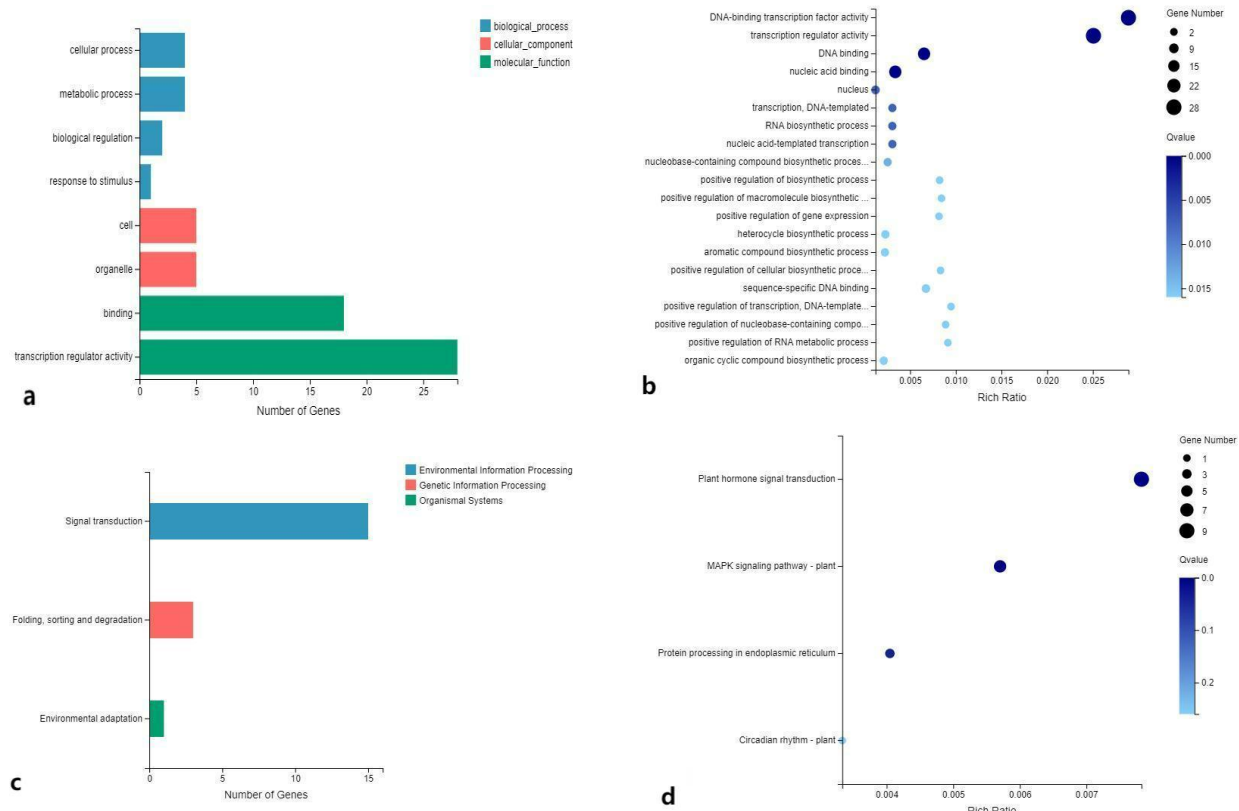

**Figure S2.**GO analysis and KEGG Pathway analysis of bZIP family.(a)GO classification of bZIP family(b)GO enrichment bubble map of the bZIP family(c)KEGG Pathway of bZIP family(d)KEGG Pathway enrichment bubble map of the bZIP family.

Note: Rich Ratio: enrichment ratio, the larger the bubble, the greater the number of genes
